# Supplementary material for: MUC1 regulates cyclin D1 gene expression through p120 catenin and β-catenin
Source: PubMed Central journal article supplement — Oncogenesis. 2014 Jun 30;3(6):e107–. doi: 10.1038/oncsis.2014.19 (PMC4150213; doi:10.1038/oncsis.2014.19), 2014-06-30
Supplement: oncsis201419x1.pdf [file oncsis201419x1.pdf]

**Figure S1**

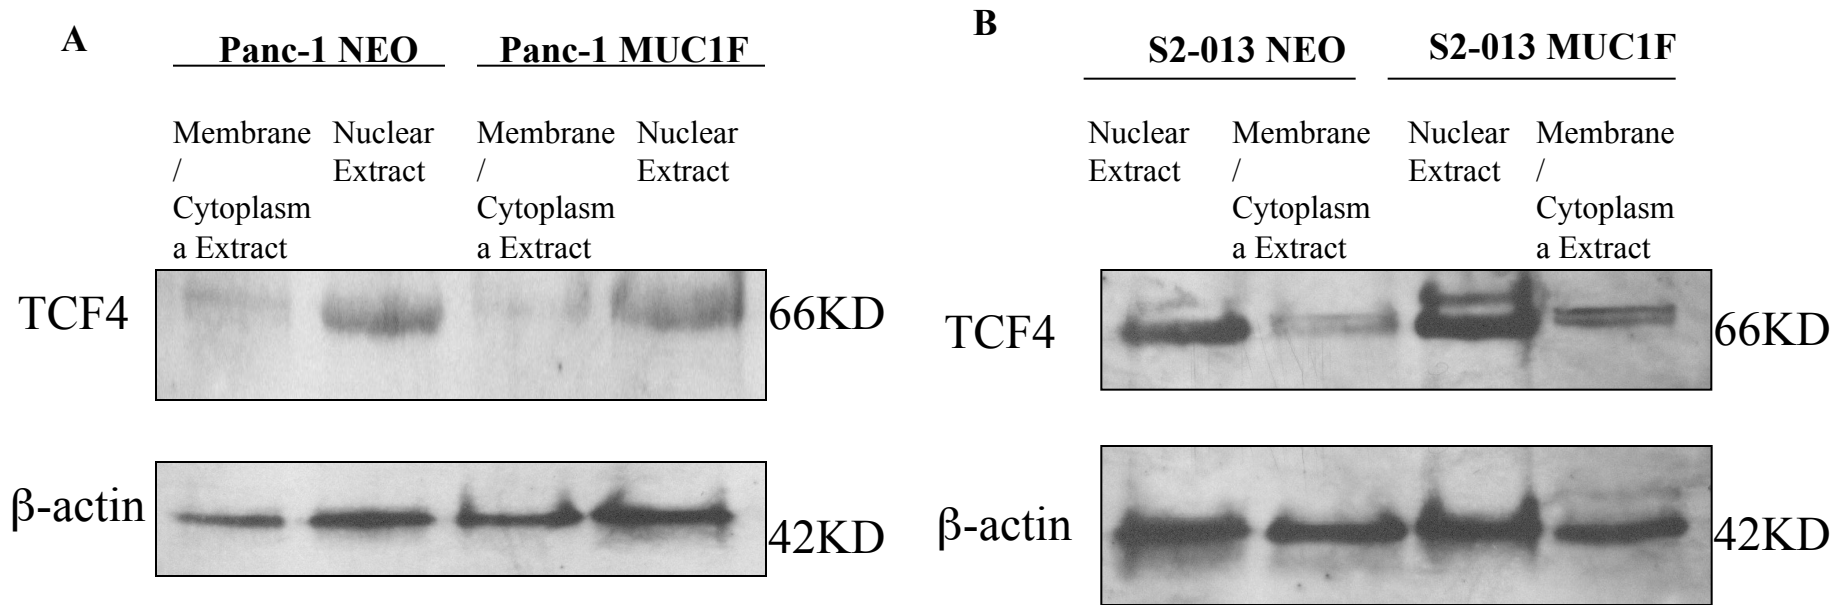

**Supplemental Figure 1. Steady-state levels of nuclear LEF-1/Tcf-4 complex in two different human pancreatic cancer cell lines: Panc-1, S2-013.**

Western blots of membrane/cytoplasmic extracts and nuclear extracts from (A) Panc-1.MUC1F, Panc-1.NEO, (B) S2-013.MUC1F, S2-013.NEO were probed with antibodies to TCF4 or beta actin, as indicated.
